# Supplementary material for: Whole-genome sequence analyses of Glaesserella parasuis isolates reveals extensive genomic variation and diverse antibiotic resistance determinants
Source: PeerJ journal article supplement (doi:10.7717/peerj.9293), 2020-06-22
Supplement: Figure_S3.pdf [file Figure_S3.pdf]

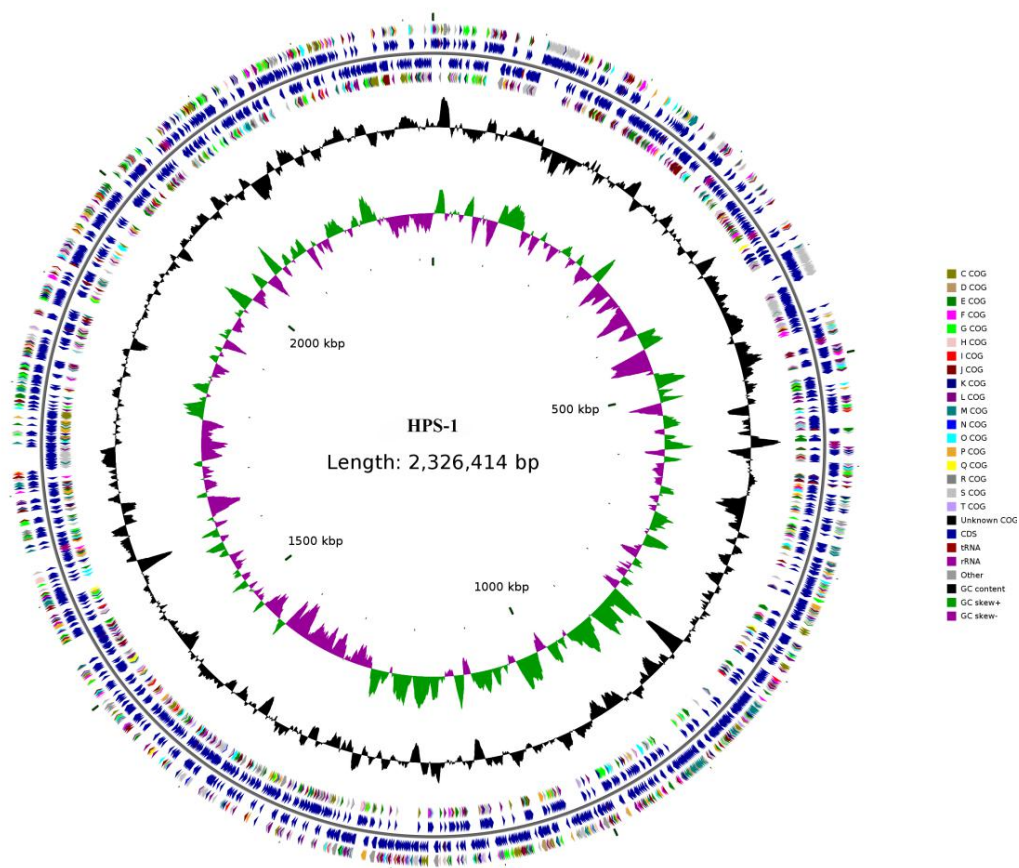

Figure. S3. Circular map of *Glaesserella parasuis* strain HPS-1. From inside to outside, the first circle represents the genome size of HPS-1; the second circle represents the GC skew; the third circle represents the GC content; the fourth circle and the seventh circle represent the COG of each CDS; the fifth and sixth circles represent the position of CDS, tRNA, and rRNA on the genome. CDS; COG; GC; rRNA, ribosomal RNA; tRNA, transfer RNA.
